# Supplementary material for: Antibacterial Activities and Molecular Docking of Novel Sulfone Biscompound Containing Bioactive 1,2,3-Triazole Moiety
Source: MDPI journal article supplement (doi:10.3390/molecules26164817), 2021-08-09

# Antibacterial Activities and Molecular Docking of Novel Sulfone Biscompound Containing Bioactive 1,2,3-Triazole Moiety

Huda R. M. Rashdan <sup>1,\*</sup>, Ihsan A. Shehadi <sup>2</sup>, Mohamad T. Abdelrahman <sup>3</sup> and Bahaa A. Hemdan <sup>4</sup>

<sup>1</sup> Chemistry of Natural and Microbial Products Department, Pharmaceutical and Drug Industries Research Division, National Research Centre, Dokki, Cairo 12622, Egypt

<sup>2</sup> Chemistry Department, College of Science, University of Sharjah, Sharjah 27272, United Arab Emirates; ishehadi@sharjah.ac.ae

<sup>3</sup> Radioisotopes Department, Nuclear Research Centre, Egyptian Atomic Energy Authority, Cairo 12311 Egypt; [mohamadt.abdelrahman@gmail.com](mailto:mohamadt.abdelrahman@gmail.com)

<sup>4</sup> Water Pollution Research Department, Environmental Research Division, National Research Centre, 33 El Buhouth Street, Cairo 12622, Egypt; [be.hemdan@iitg.ac.in](mailto:be.hemdan@iitg.ac.in)

\* Correspondence: [hr.rashdan@nrc.sci.eg](mailto:hr.rashdan@nrc.sci.eg)

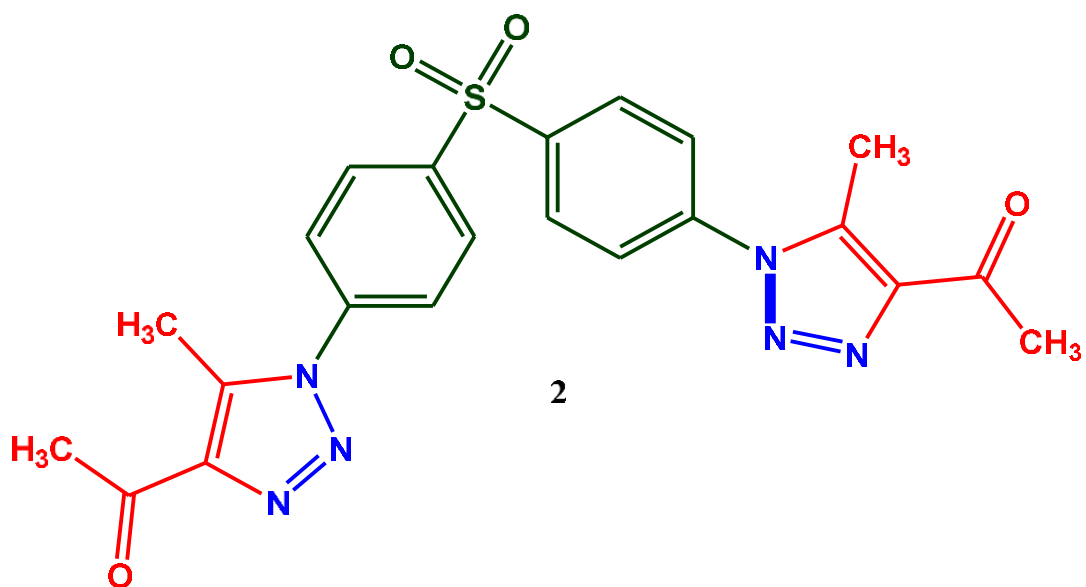

HODA-REFAAT/DAP-DMSO-1H  
HODA-REFAAT/DAP-DMSO-1H

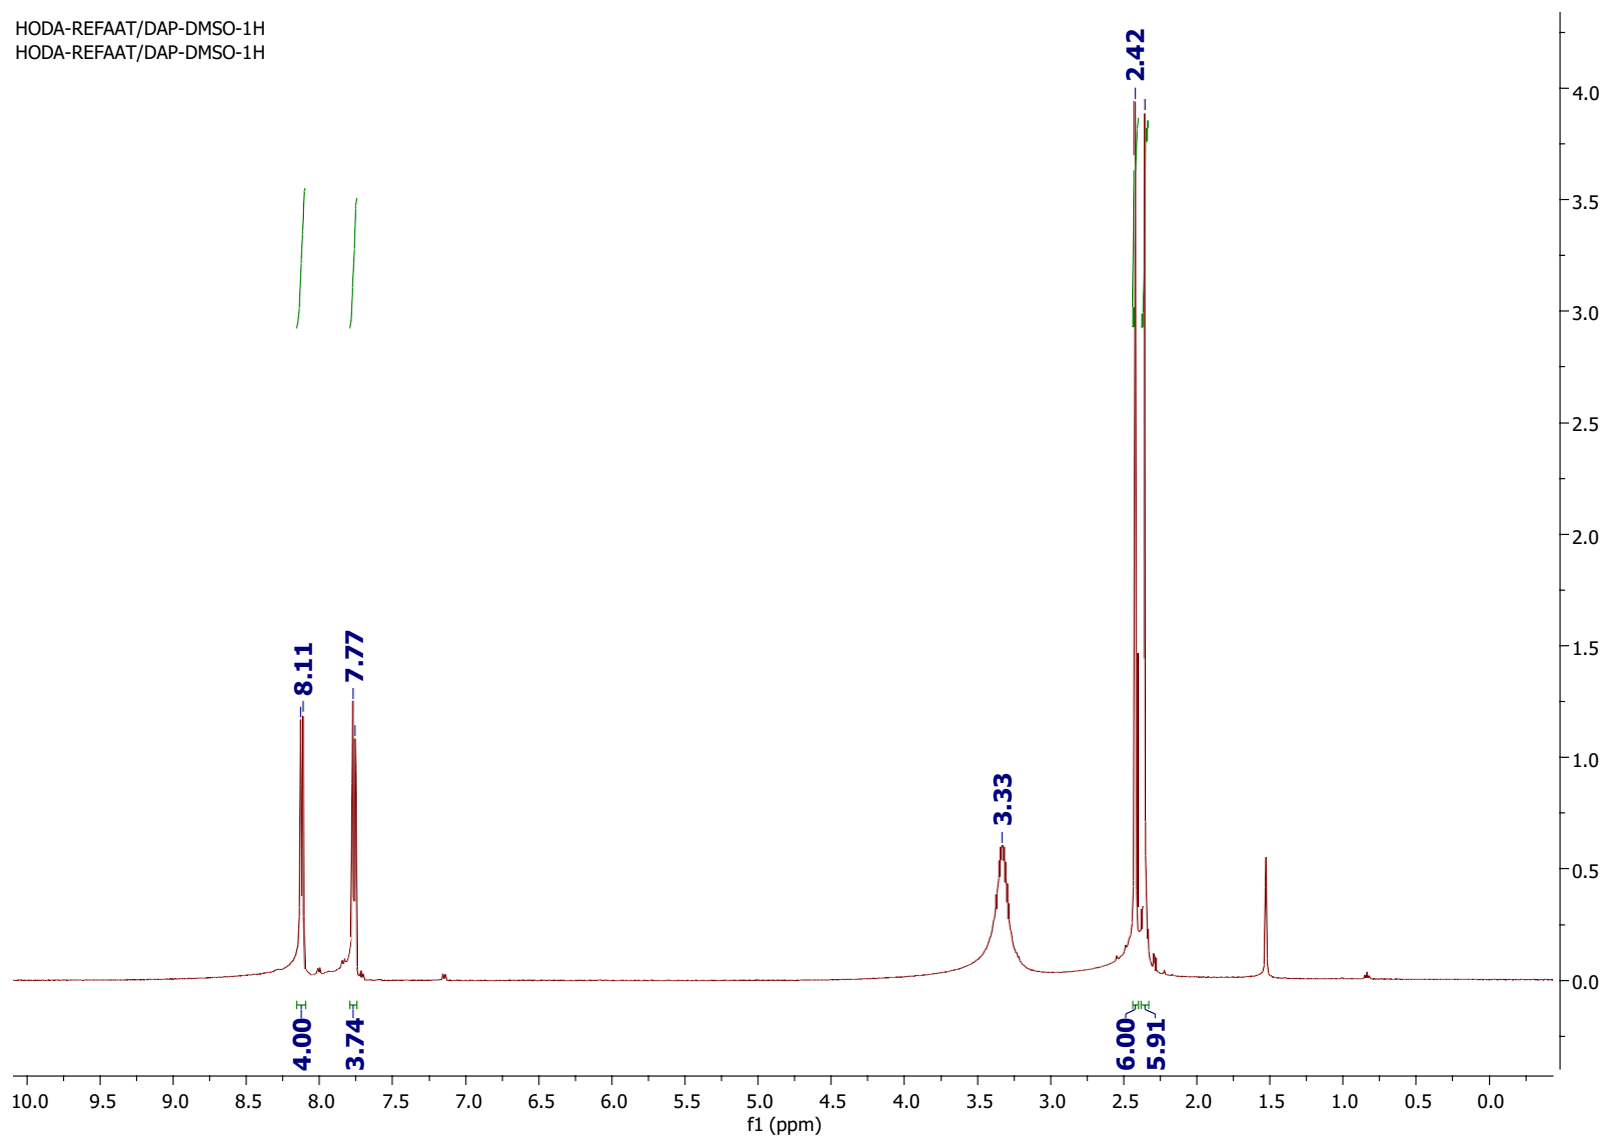

HODA-REFAAT/DAP-DMSO-1H  
HODA-REFAAT/DAP-DMSO-1H

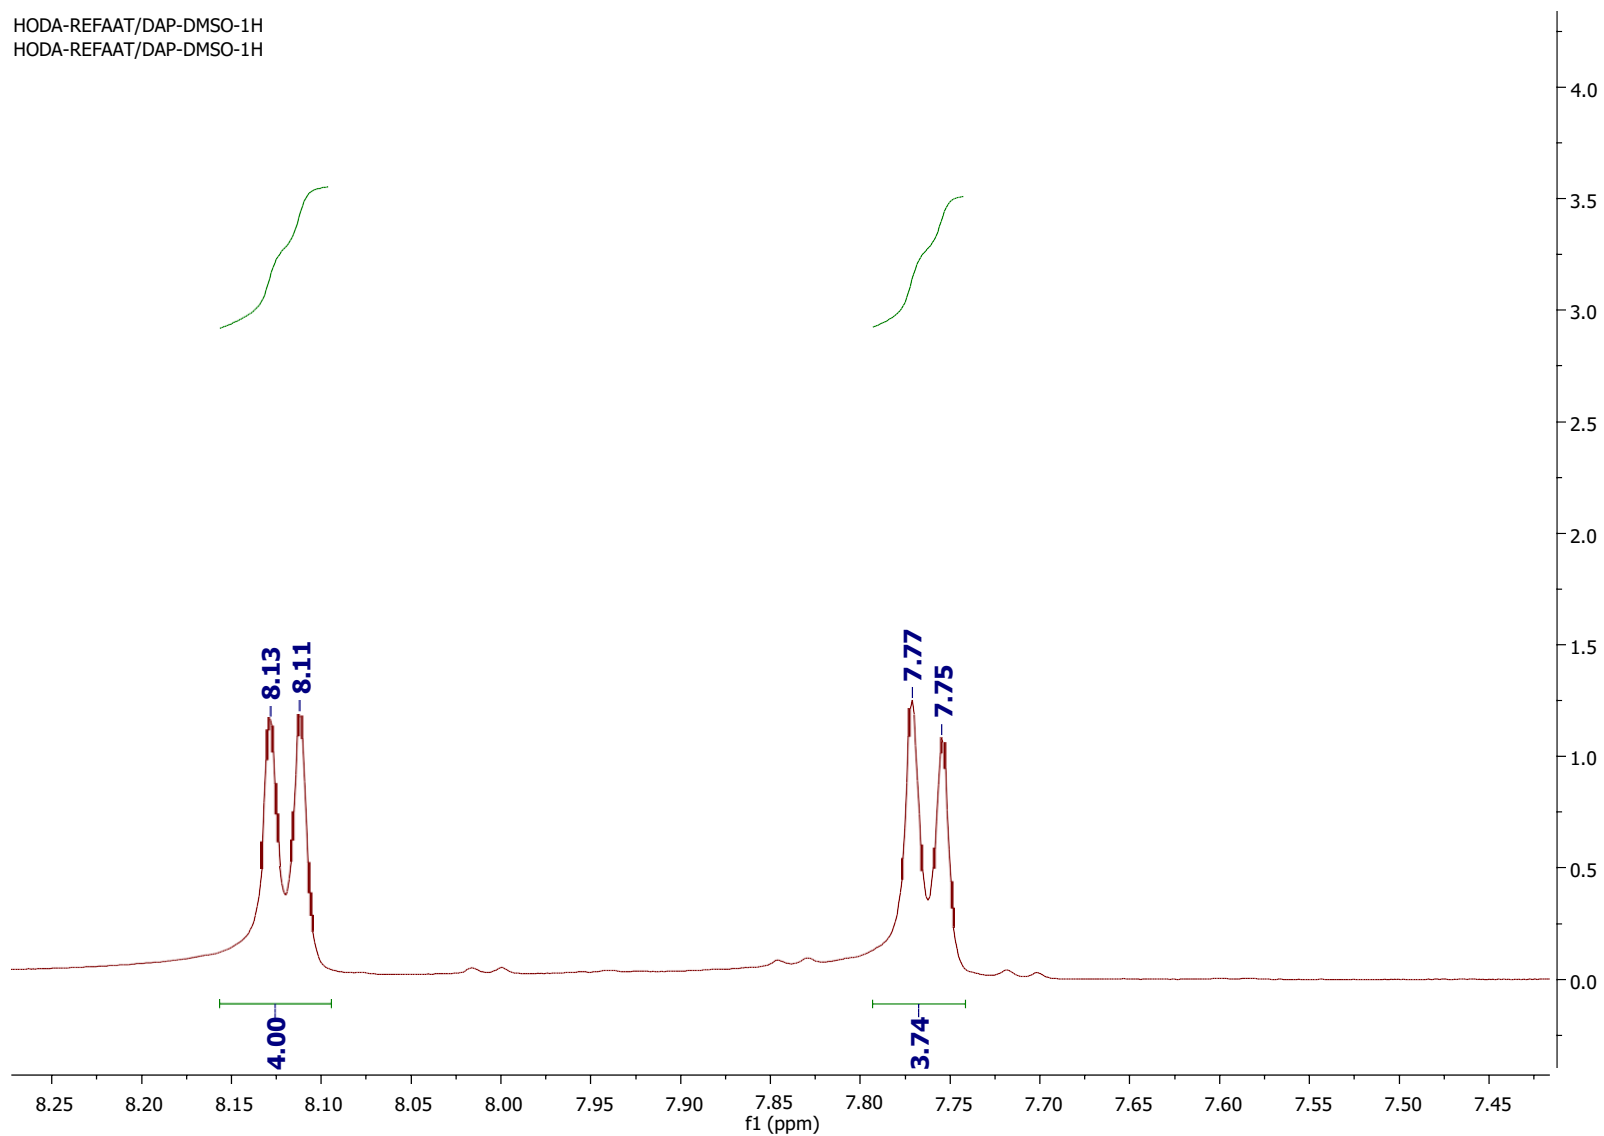

HODA-REFAAT/DAP-DMSO-1H  
HODA-REFAAT/DAP-DMSO-1H

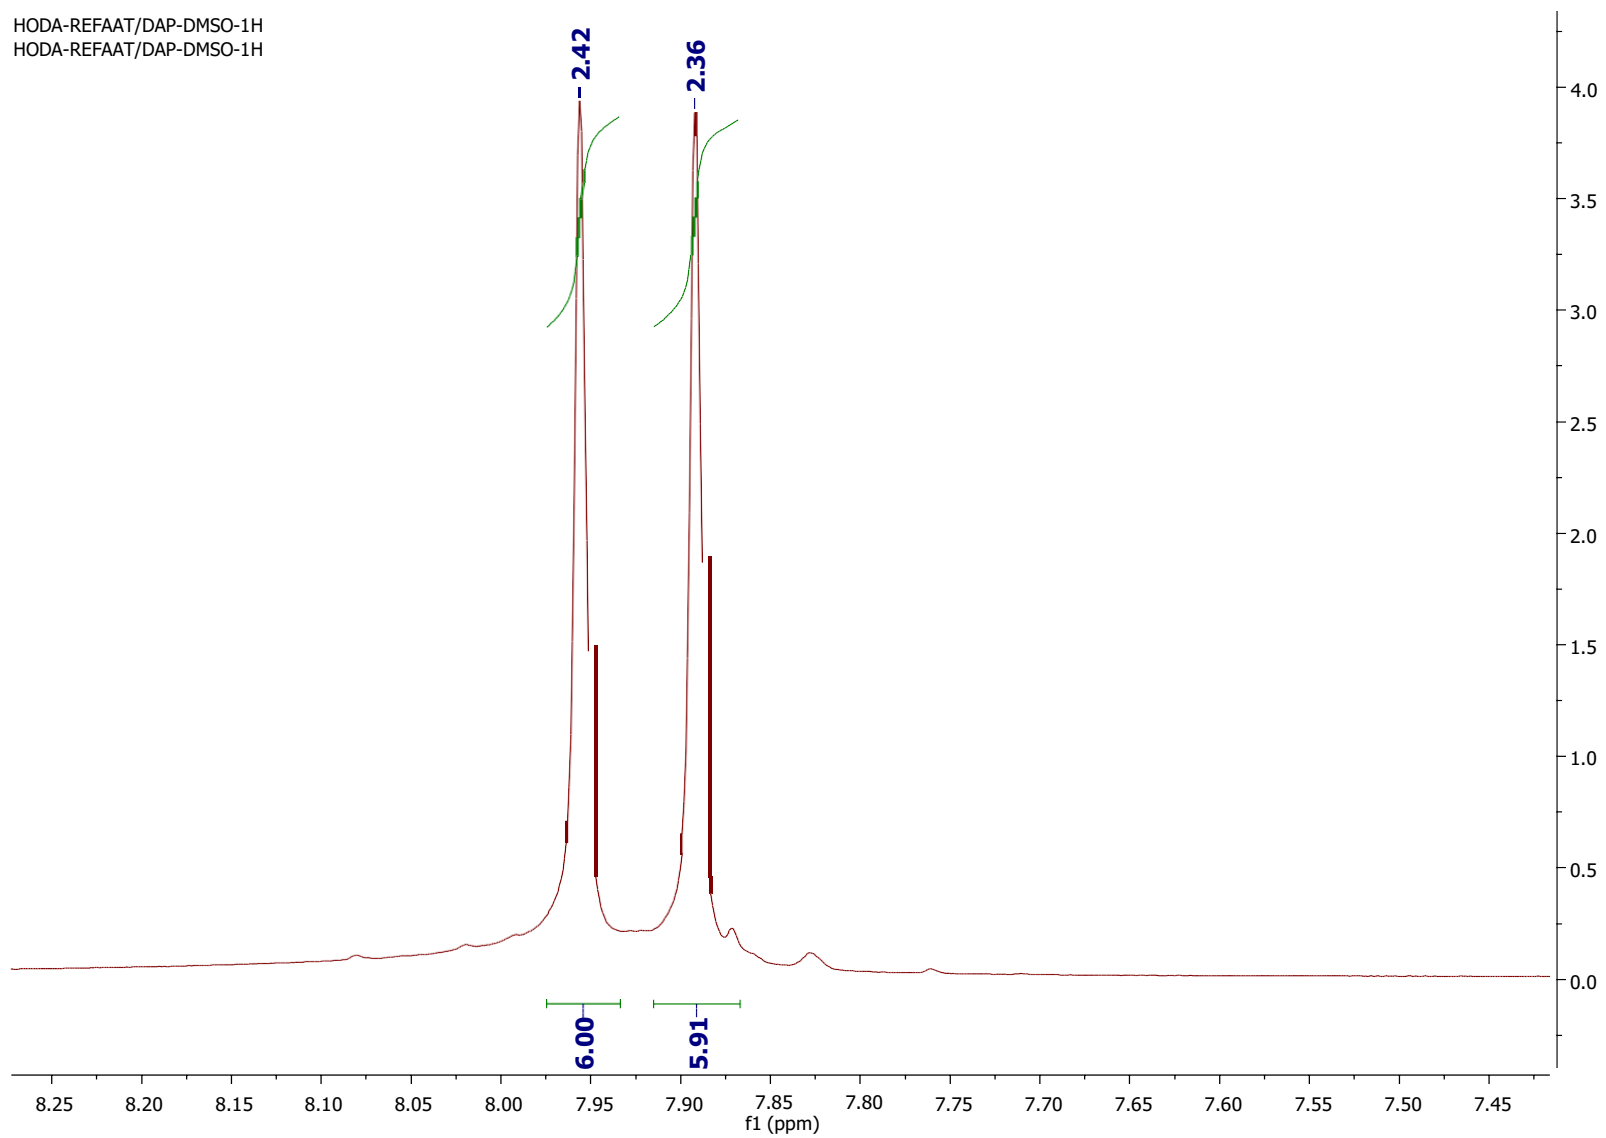

HODA-REFAAT/DAP-DMSO-13C  
HODA-REFAAT/DAP-DMSO-13C

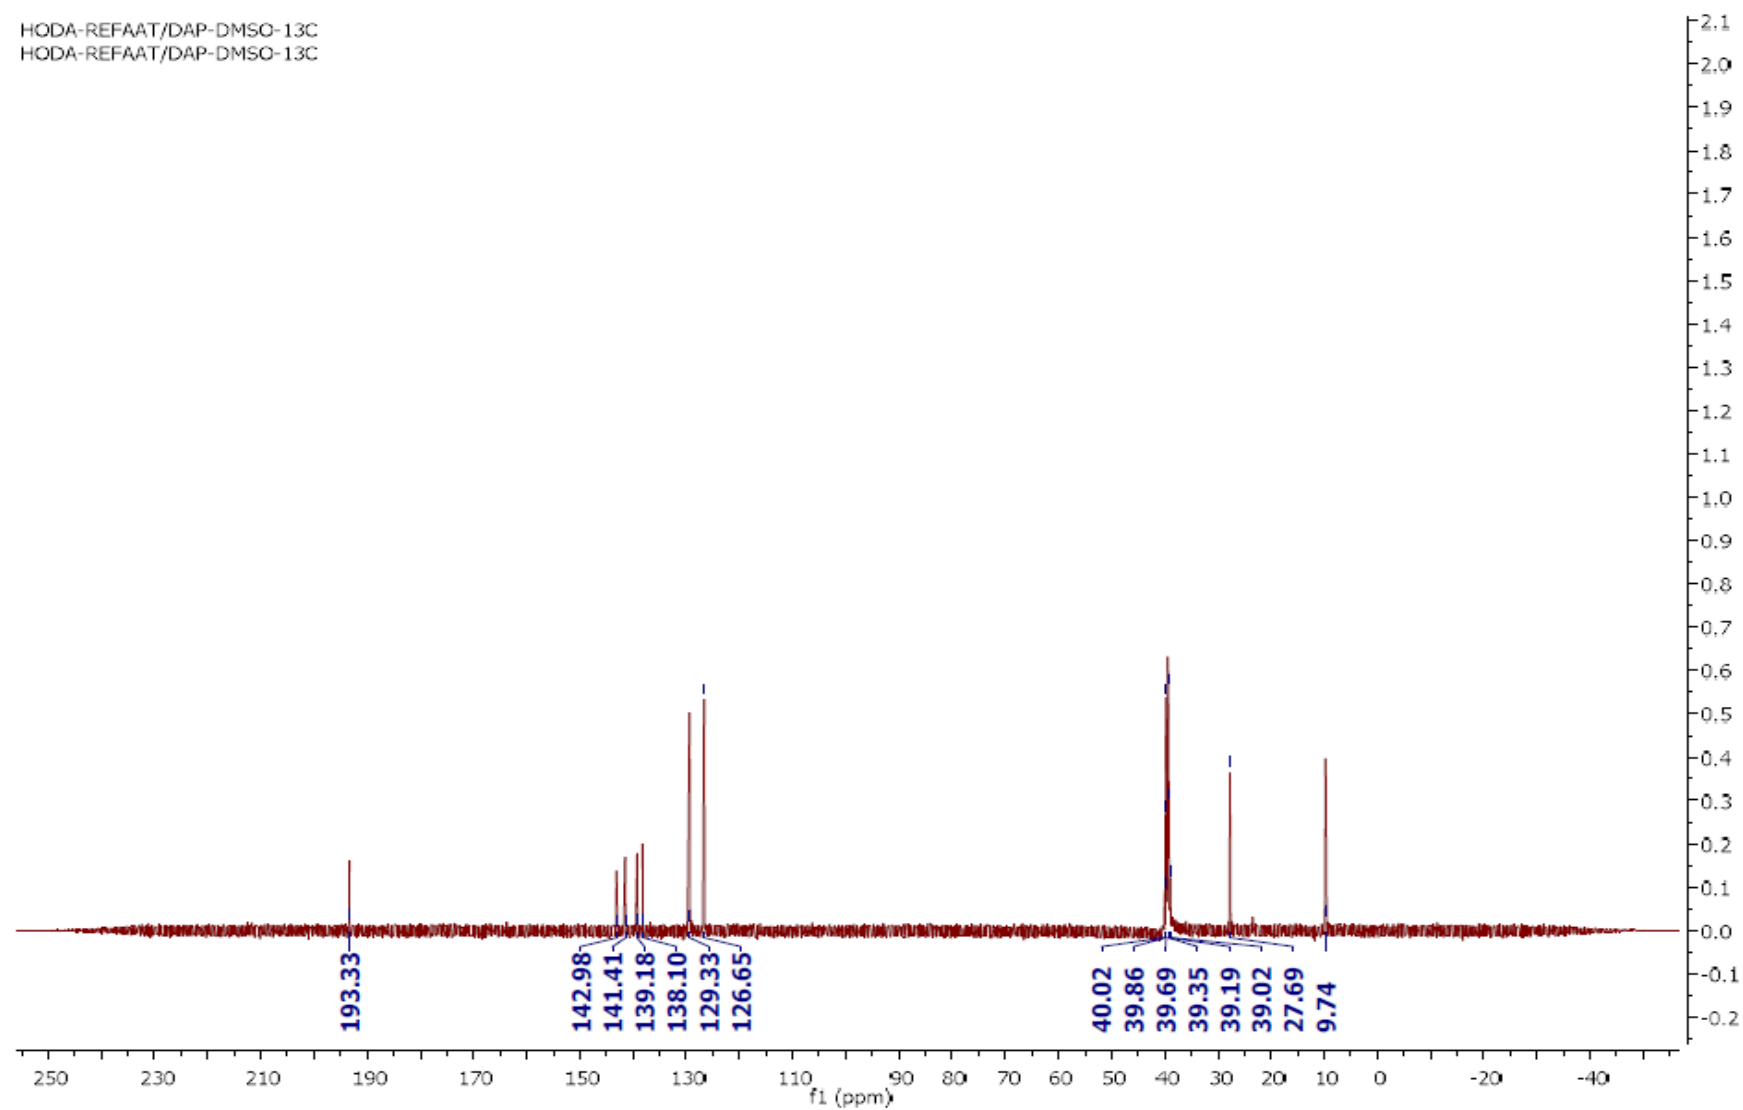

Supplement: s1 [file s1]
